# Supplementary material
Source: publisher figshare collection journal article supplement (https://diabetesjournals.figshare.com/articles/dataset/_/14207852)
Supplement: Supplementary file 2 [file 1]

SUPPLEMENT

Supplementary Table 1 NIH Toolbox Cognition Battery Fully Corrected Test Scores‡.

|                                                  | Total | Type 1      | Type 2      | <i>P</i> value* |
|--------------------------------------------------|-------|-------------|-------------|-----------------|
|                                                  | N     | Diabetes    | Diabetes    |                 |
|                                                  |       | (n = 1095)  | (n = 285)   |                 |
| Composite fluid cognition                        | 1380  | 46.7 (10.9) | 42.7 (11.5) | <.0001          |
| Pattern comparison processing speed (fluid)      | 1380  | 50.2 (13.5) | 47.3 (14.0) | 0.0011          |
| Flanker inhibitory control and attention (fluid) | 1380  | 39.7 (8.8)  | 38.4 (9.9)  | 0.0416          |
| List sorting working memory (fluid)              | 1380  | 48.9 (9.3)  | 45.1 (10.8) | <.0001          |
| Picture sequence memory (fluid)                  | 1380  | 52.1 (11.3) | 49.4 (9.9)  | <.0001          |
| Dimensional change card sort (fluid)             | 1380  | 49.0 (10.9) | 45.9 (11.9) | 0.0001          |
| Picture vocabulary (crystallized)                | 1380  | 53.0 (10.0) | 48.8 (10.4) | <.0001          |

\* *P*-value from t-test.

‡ NIH Toolbox fully-corrected cognition test scores (mean=50, SD=10; lower scores indicate poorer performance on cognitive test compared to national average for age and race/ethnic group).
